# Supplementary material
Source: PubMed Central journal article supplement (PMC4793614)
Supplement: fora019490.w1_default.pdf [file fora019490.w1_default.pdf]

## Appendix 1: Details of literature search

Database: Ovid MEDLINE(R) In-Process & Other Non-Indexed Citations and Ovid MEDLINE(R)  
<1946 to Present> (Oct2013)

### Search Strategy:

- 1 exp Helicobacter/ or exp Helicobacter pylori/ or exp Helicobacter Infections/
- 2 (helicobacter or campylobacter).mp.
- 3 (pylori or pyloridis or HP).ti,ab,kw.
- 4 1 or 2 or 3
- 5 exp Stomach Neoplasms/
- 6 exp Lymphoma, B-Cell, Marginal Zone/
- 7 (mucosa associated lymphoid tissue lymphoma or MALT).ti,ab,kw.
- 8 ((stomach or gastric) adj3 (cancer\* or carcinoma\* or neoplas\* or tumor\* or tumour\* or lymphoma or adenocarcinoma or malignant)).ti,ab,kw.
- 9 or/5-8
- 10 4 and 9
- 11 randomized controlled trial.pt.
- 12 controlled clinical trial.pt.
- 13 placebo.ab.
- 14 drug therapy.fs.
- 15 random\$.mp.
- 16 trial.ab.
- 17 groups.ab.
- 18 or/11-17
- 19 case report/
- 20 Case study/
- 21 exp animals/ not exp humans/
- 22 or/19-21
- 23 18 not 22
- 24 10 and 23
- 25 exp Omeprazole/ or exp Proton Pump Inhibitors/
- 26 exp esomeprazole/
- 27 ((proton adj2 pump adj2 inhibitor\$) or PPI or PPIs).ti,ab,kw.
- 28 (omeprazole or losec or nexium or prilosec or rapinex or zegerid or ocid or Lomac or Omepal or Omez).tw.
- 29 (pantoprazole or protium or protonix or Pantotab or Pantopan or Pantozol or Pantor or Pantoloc or Astropan or Controloc or Pantecta or Inipomp or Somac or Pantodac or Zurcal or Zentro).tw.
- 30 (lansoprazole or lanzoprazole or ag 1749 or agopton or bamalite or lanzor or monolimum or ogast or ogastro or opiren or prevacid or prezal or pro ulco or promeco or takepron or ulpax or zoton).tw.
- 31 (rabeprazole or aciphex or dexrabeprazole or e 3810 or ly-307640 or pariet).tw.
- 32 (esomeprazole or nexium).tw.
- 33 (dexlansoprazole or Kapidex or Dexilant).tw.
- 34 (tenatoprazole or CAS 113712-98-4 or STU-Na).tw.

35 exp Esomeprazole Sodium/  
36 or/25-35  
37 exp Histamine H2 Antagonists/  
38 exp Cimetidine/  
39 exp Ranitidine/  
40 exp Famotidine/  
41 exp Nizatidine/  
42 (H2 receptor antagonist\* or H2RA\* or H2-RA).tw.  
43 (ranitidine or zantac or famotidine or pepcid or cimetidine or tagamet or nizatidine or  
Axid).tw.  
44 histamine2 receptor antagonist.tw.  
45 or/37-44  
46 exp Bismuth/  
47 exp Amoxicillin/  
48 exp Clarithromycin/  
49 exp Nitroimidazoles/  
50 exp Macrolides/  
51 (metronidazole or tinidazole or amoxicillin or amoxycillin).ti,ab,kw.  
52 (clarithromycin or azithromycin or roxithromycin).ti,ab,kw.  
53 (bismuth or nitroimidazole\* or macrolide\*).ti,ab,kw.  
54 or/37-53  
55 36 or 45 or 54  
56 24 and 55
