# Supplementary material
Source: PubMed Central journal article supplement (PMC4793614)
Supplement: fora019490.w2_default.pdf [file fora019490.w2_default.pdf]

## Appendix 2: Table of possible treatment combinations in randomized controlled trials of factorial design

| Study                                                        | Treatment arms                                                                                  | Number of subjects | Analysis data included in |
|--------------------------------------------------------------|-------------------------------------------------------------------------------------------------|--------------------|---------------------------|
| <b>Correa 2000<sup>22</sup> and Correa 2001<sup>35</sup></b> | Placebo beta-carotene and placebo ascorbic acid                                                 | 100                | Primary                   |
|                                                              | Active eradication therapy, placebo beta-carotene, and placebo ascorbic acid                    | 106                | Primary                   |
|                                                              | Active beta-carotene, and placebo ascorbic acid                                                 | 101                | Primary                   |
|                                                              | Placebo beta-carotene and active ascorbic acid                                                  | 116                | Primary                   |
|                                                              | Active eradication therapy, active beta-carotene, and placebo ascorbic acid                     | 113                | Primary                   |
|                                                              | Active eradication therapy, placebo beta-carotene, and active ascorbic acid                     | 96                 | Primary                   |
|                                                              | Active beta-carotene and active ascorbic acid                                                   | 98                 | Primary                   |
|                                                              | Active eradication therapy, active beta-carotene, and active ascorbic acid                      | 122                | Primary                   |
| <b>You 2006<sup>32</sup> and Ma 2012<sup>26</sup></b>        | Active eradication therapy, active garlic, and active vitamin C, vitamin E, and selenium        | 283                | Primary                   |
|                                                              | Active eradication therapy, active garlic, and placebo vitamin C, vitamin E, and selenium       | 283                | Primary                   |
|                                                              | Active eradication therapy, placebo garlic, and active vitamin C, vitamin E, and selenium       | 281                | Primary                   |
|                                                              | Active eradication therapy, placebo garlic, and placebo vitamin C, vitamin E, and selenium      | 283                | Primary                   |
|                                                              | Placebo eradication therapy, active garlic, and active vitamin C, vitamin E, and selenium       | 279                | Primary                   |
|                                                              | Placebo eradication therapy, active garlic, and placebo vitamin C, vitamin E, and selenium      | 282                | Primary                   |
|                                                              | Placebo eradication therapy, placebo garlic, and active vitamin C, vitamin E, and selenium only | 283                | Primary                   |
|                                                              | Placebo eradication therapy, placebo garlic, and placebo vitamin C, vitamin E, and selenium     | 284                | Primary                   |
| <b>Wong 2012<sup>25</sup></b>                                | Placebo eradication therapy and placebo celecoxib                                               | 258                | Primary                   |
|                                                              | Active eradication therapy and active celecoxib                                                 | 255                | Sensitivity               |
|                                                              | Active eradication therapy and placebo celecoxib                                                | 255                | Primary                   |
|                                                              | Placebo eradication therapy and active celecoxib                                                | 256                | Sensitivity               |
